# Supplementary material
Source: publisher figshare collection journal article supplement (https://acs.figshare.com/ndownloader/files/4095631)
Supplement: Supplementary file 1 [file 4095631]

data_12 
# start Validation Reply Form
_vrf_PLAT602_12
;
PROBLEM: VERY LARGE Solvent Accessible VOID(S) in Structure        !
RESPONSE: Likely due to loss of solvent on crystal drying.  Void volume
calculated using PLATON as 937.9 \%A per unit cell, 14.4 % of the volume.
;
# end Validation Reply Form

  
_audit_creation_method            SHELXL-97 
_chemical_name_systematic 
; 
 ? 
; 
_chemical_name_common             ? 
_chemical_melting_point           ? 
_chemical_formula_moiety          'C74 H63 Cl N2 O4 Pd' 
_chemical_formula_sum 
 'C74 H63 Cl N2 O4 Pd' 
_chemical_formula_weight          1186.11 
  
loop_ 
 _atom_type_symbol 
 _atom_type_description 
 _atom_type_scat_dispersion_real 
 _atom_type_scat_dispersion_imag 
 _atom_type_scat_source 
 'C'  'C'   0.0033   0.0016 
 'International Tables Vol C Tables 4.2.6.8 and 6.1.1.4' 
 'H'  'H'   0.0000   0.0000 
 'International Tables Vol C Tables 4.2.6.8 and 6.1.1.4' 
 'N'  'N'   0.0061   0.0033 
 'International Tables Vol C Tables 4.2.6.8 and 6.1.1.4' 
 'O'  'O'   0.0106   0.0060 
 'International Tables Vol C Tables 4.2.6.8 and 6.1.1.4' 
 'Cl'  'Cl'   0.1484   0.1585 
 'International Tables Vol C Tables 4.2.6.8 and 6.1.1.4' 
 'Pd'  'Pd'  -0.9988   1.0072 
 'International Tables Vol C Tables 4.2.6.8 and 6.1.1.4' 
  
_symmetry_cell_setting            Monoclinic 
_symmetry_space_group_name_H-M    'P 21/c' 
  
loop_ 
 _symmetry_equiv_pos_as_xyz 
 'x, y, z' 
 '-x, y+1/2, -z+1/2' 
 '-x, -y, -z' 
 'x, -y-1/2, z-1/2' 
  
_cell_length_a                    15.224(3) 
_cell_length_b                    20.393(3) 
_cell_length_c                    21.991(3) 
_cell_angle_alpha                 90.00 
_cell_angle_beta                  107.692(4) 
_cell_angle_gamma                 90.00 
_cell_volume                      6504.4(18) 
_cell_formula_units_Z             4 
_cell_measurement_temperature     93(2) 
_cell_measurement_reflns_used     20499 
_cell_measurement_theta_min       1.4 
_cell_measurement_theta_max       28.9 
  
_exptl_crystal_description        Prism 
_exptl_crystal_colour             Yellow 
_exptl_crystal_size_max           0.25 
_exptl_crystal_size_mid           0.15 
_exptl_crystal_size_min           0.10 
_exptl_crystal_density_meas       ? 
_exptl_crystal_density_diffrn     1.211 
_exptl_crystal_density_method     'not measured' 
_exptl_crystal_F_000              2464 
_exptl_absorpt_coefficient_mu     0.375 
_exptl_absorpt_correction_type    multi-scan 
_exptl_absorpt_correction_T_min   0.773 
_exptl_absorpt_correction_T_max   1.000 
_exptl_absorpt_process_details    'Jacobson, R. (1998) Private communication' 
  
_exptl_special_details 
; 
 ? 
; 
  
_diffrn_ambient_temperature       93(2) 
_diffrn_radiation_wavelength      0.71073 
_diffrn_radiation_type            MoK\a 
_diffrn_radiation_source          'fine-focus sealed tube' 
_diffrn_radiation_monochromator   graphite 
_diffrn_measurement_device_type   CCD 
_diffrn_measurement_method        '\w and \f scans' 
_diffrn_detector_area_resol_mean  14.7059 
_diffrn_standards_number          ? 
_diffrn_standards_interval_count  ? 
_diffrn_standards_interval_time   ? 
_diffrn_standards_decay_%         ? 
_diffrn_reflns_number             41230 
_diffrn_reflns_av_R_equivalents   0.0638 
_diffrn_reflns_av_sigmaI/netI     0.0744 
_diffrn_reflns_limit_h_min        -18 
_diffrn_reflns_limit_h_max        14 
_diffrn_reflns_limit_k_min        -24 
_diffrn_reflns_limit_k_max        24 
_diffrn_reflns_limit_l_min        -22 
_diffrn_reflns_limit_l_max        26 
_diffrn_reflns_theta_min          1.39 
_diffrn_reflns_theta_max          25.35 
_reflns_number_total              11842 
_reflns_number_gt                 9159 
_reflns_threshold_expression      >2sigma(I) 
  
_computing_data_collection        'CrystalClear-SM Expert 2.0 (Rigaku, 2010)' 
_computing_cell_refinement        'CrystalClear-SM Expert 2.0 (Rigaku, 2010)' 
_computing_data_reduction         'CrystalClear-SM Expert 2.0 (Rigaku, 2010)' 
_computing_structure_solution     'SHELXS-97 (Sheldrick, 1990)' 
_computing_structure_refinement   'SHELXL-97 (Sheldrick, 1997)' 
_computing_molecular_graphics     'Bruker SHELXTL' 
_computing_publication_material   'Bruker SHELXTL' 
  
_refine_special_details 
; 
 Refinement of F^2^ against ALL reflections.  The weighted R-factor wR and 
 goodness of fit S are based on F^2^, conventional R-factors R are based 
 on F, with F set to zero for negative F^2^. The threshold expression of 
 F^2^ > 2sigma(F^2^) is used only for calculating R-factors(gt) etc. and is 
 not relevant to the choice of reflections for refinement.  R-factors based 
 on F^2^ are statistically about twice as large as those based on F, and R- 
 factors based on ALL data will be even larger. 
; 
  
_refine_ls_structure_factor_coef  Fsqd 
_refine_ls_matrix_type            full 
_refine_ls_weighting_scheme       calc 
_refine_ls_weighting_details 
 'calc w=1/[\s^2^(Fo^2^)+(0.1385P)^2^+15.6361P] where P=(Fo^2^+2Fc^2^)/3' 
_atom_sites_solution_primary      direct 
_atom_sites_solution_secondary    difmap 
_atom_sites_solution_hydrogens    geom 
_refine_ls_hydrogen_treatment     constr
_refine_ls_extinction_method      none 
_refine_ls_extinction_coef        ? 
_refine_ls_number_reflns          11842 
_refine_ls_number_parameters      743 
_refine_ls_number_restraints      0 
_refine_ls_R_factor_all           0.0953 
_refine_ls_R_factor_gt            0.0756 
_refine_ls_wR_factor_ref          0.2508 
_refine_ls_wR_factor_gt           0.2339 
_refine_ls_goodness_of_fit_ref    1.078 
_refine_ls_restrained_S_all       1.078 
_refine_ls_shift/su_max           0.001 
_refine_ls_shift/su_mean          0.000 
  
loop_ 
 _atom_site_label 
 _atom_site_type_symbol 
 _atom_site_fract_x 
 _atom_site_fract_y 
 _atom_site_fract_z 
 _atom_site_U_iso_or_equiv 
 _atom_site_adp_type 
 _atom_site_occupancy 
 _atom_site_symmetry_multiplicity 
 _atom_site_calc_flag 
 _atom_site_refinement_flags 
 _atom_site_disorder_assembly 
 _atom_site_disorder_group 
Pd1 Pd 0.77370(3) 0.227207(19) 0.245143(19) 0.02398(17) Uani 1 1 d . . . 
Cl1 Cl 0.83767(10) 0.26943(7) 0.17167(7) 0.0342(3) Uani 1 1 d . . . 
O1 O 0.5236(3) 0.2185(2) -0.03808(19) 0.0355(10) Uani 1 1 d . . . 
O2 O 1.1355(3) 0.15158(19) 0.50149(17) 0.0332(9) Uani 1 1 d . . . 
O3 O 0.7094(2) 0.18662(18) 0.30716(19) 0.0290(9) Uani 1 1 d . . . 
O4 O 0.7367(3) 0.3206(2) 0.26129(19) 0.0366(10) Uani 1 1 d . . . 
N2 N 0.7674(3) 0.1007(2) 0.17614(19) 0.0218(9) Uani 1 1 d . . . 
N5 N 0.8706(3) 0.0972(2) 0.26816(19) 0.0213(9) Uani 1 1 d . . . 
C1 C 0.8080(3) 0.1376(3) 0.2280(2) 0.0231(11) Uani 1 1 d . . . 
C3 C 0.8019(3) 0.0374(2) 0.1844(2) 0.0232(11) Uani 1 1 d . . . 
H3A H 0.7830 0.0021 0.1551 0.028 Uiso 1 1 calc R . . 
C4 C 0.8664(4) 0.0351(3) 0.2409(2) 0.0249(11) Uani 1 1 d . . . 
H4A H 0.9027 -0.0019 0.2592 0.030 Uiso 1 1 calc R . . 
C6 C 0.7012(3) 0.1266(2) 0.1189(2) 0.0218(11) Uani 1 1 d . . . 
C7 C 0.6109(4) 0.1385(3) 0.1196(2) 0.0259(11) Uani 1 1 d . . . 
C8 C 0.5505(4) 0.1693(3) 0.0668(3) 0.0302(12) Uani 1 1 d . . . 
H8A H 0.4893 0.1788 0.0665 0.036 Uiso 1 1 calc R . . 
C9 C 0.5792(4) 0.1863(3) 0.0146(3) 0.0295(12) Uani 1 1 d . . . 
C10 C 0.6665(4) 0.1691(3) 0.0128(2) 0.0280(12) Uani 1 1 d . . . 
H10A H 0.6843 0.1790 -0.0240 0.034 Uiso 1 1 calc R . . 
C11 C 0.7282(3) 0.1376(3) 0.0642(2) 0.0243(11) Uani 1 1 d . . . 
C12 C 0.5784(4) 0.1119(3) 0.1736(3) 0.0273(12) Uani 1 1 d . . . 
H12A H 0.6276 0.1220 0.2145 0.033 Uiso 1 1 calc R . . 
C13 C 0.4895(4) 0.1446(3) 0.1773(3) 0.0283(12) Uani 1 1 d . . . 
C14 C 0.4910(4) 0.2119(3) 0.1897(3) 0.0374(14) Uani 1 1 d . . . 
H14A H 0.5466 0.2358 0.1962 0.045 Uiso 1 1 calc R . . 
C15 C 0.4115(5) 0.2446(4) 0.1926(4) 0.0487(17) Uani 1 1 d . . . 
H15A H 0.4128 0.2904 0.2008 0.058 Uiso 1 1 calc R . . 
C16 C 0.3309(5) 0.2089(4) 0.1834(4) 0.0490(17) Uani 1 1 d . . . 
H16A H 0.2763 0.2304 0.1850 0.059 Uiso 1 1 calc R . . 
C17 C 0.3298(5) 0.1434(4) 0.1721(4) 0.061(2) Uani 1 1 d . . . 
H17A H 0.2743 0.1194 0.1660 0.073 Uiso 1 1 calc R . . 
C18 C 0.4091(4) 0.1110(3) 0.1695(3) 0.0412(15) Uani 1 1 d . . . 
H18A H 0.4073 0.0650 0.1621 0.049 Uiso 1 1 calc R . . 
C19 C 0.5699(4) 0.0374(3) 0.1685(3) 0.0304(12) Uani 1 1 d . . . 
C20 C 0.5826(4) 0.0004(3) 0.2240(3) 0.0441(16) Uani 1 1 d . . . 
H20A H 0.5965 0.0221 0.2641 0.053 Uiso 1 1 calc R . . 
C21 C 0.5752(5) -0.0678(3) 0.2216(4) 0.056(2) Uani 1 1 d . . . 
H21A H 0.5855 -0.0925 0.2597 0.067 Uiso 1 1 calc R . . 
C22 C 0.5523(4) -0.0996(3) 0.1619(4) 0.054(2) Uani 1 1 d . . . 
H22A H 0.5454 -0.1459 0.1593 0.065 Uiso 1 1 calc R . . 
C23 C 0.5400(4) -0.0635(3) 0.1079(4) 0.0463(17) Uani 1 1 d . . . 
H23A H 0.5252 -0.0850 0.0677 0.056 Uiso 1 1 calc R . . 
C24 C 0.5490(4) 0.0049(3) 0.1106(3) 0.0368(14) Uani 1 1 d . . . 
H24A H 0.5407 0.0292 0.0724 0.044 Uiso 1 1 calc R . . 
C25 C 0.4319(5) 0.2346(4) -0.0380(4) 0.057(2) Uani 1 1 d . . . 
H25A H 0.4023 0.2624 -0.0749 0.086 Uiso 1 1 calc R . . 
H25B H 0.4346 0.2583 0.0013 0.086 Uiso 1 1 calc R . . 
H25C H 0.3960 0.1943 -0.0404 0.086 Uiso 1 1 calc R . . 
C26 C 0.8170(4) 0.1081(3) 0.0577(3) 0.0257(11) Uani 1 1 d . . . 
H26A H 0.8636 0.1095 0.1010 0.031 Uiso 1 1 calc R . . 
C27 C 0.8575(4) 0.1465(3) 0.0128(3) 0.0266(12) Uani 1 1 d . . . 
C28 C 0.8524(4) 0.1239(3) -0.0479(3) 0.0326(13) Uani 1 1 d . . . 
H28A H 0.8219 0.0837 -0.0629 0.039 Uiso 1 1 calc R . . 
C29 C 0.8922(4) 0.1602(3) -0.0869(3) 0.0383(14) Uani 1 1 d . . . 
H29A H 0.8870 0.1446 -0.1285 0.046 Uiso 1 1 calc R . . 
C30 C 0.9381(4) 0.2174(3) -0.0664(3) 0.0374(14) Uani 1 1 d . . . 
H30A H 0.9658 0.2411 -0.0930 0.045 Uiso 1 1 calc R . . 
C31 C 0.9437(5) 0.2403(3) -0.0052(3) 0.0413(15) Uani 1 1 d . . . 
H31A H 0.9755 0.2800 0.0100 0.050 Uiso 1 1 calc R . . 
C32 C 0.9031(4) 0.2056(3) 0.0330(3) 0.0375(14) Uani 1 1 d . . . 
H32A H 0.9063 0.2223 0.0739 0.045 Uiso 1 1 calc R . . 
C33 C 0.8021(4) 0.0355(3) 0.0386(2) 0.0281(12) Uani 1 1 d . . . 
C34 C 0.7161(4) 0.0093(3) 0.0066(3) 0.0368(14) Uani 1 1 d . . . 
H34A H 0.6631 0.0367 -0.0037 0.044 Uiso 1 1 calc R . . 
C35 C 0.7070(5) -0.0564(3) -0.0105(4) 0.0487(17) Uani 1 1 d . . . 
H35A H 0.6477 -0.0738 -0.0320 0.058 Uiso 1 1 calc R . . 
C36 C 0.7834(5) -0.0967(3) 0.0035(3) 0.0479(17) Uani 1 1 d . . . 
H36A H 0.7771 -0.1419 -0.0077 0.057 Uiso 1 1 calc R . . 
C37 C 0.8687(5) -0.0708(3) 0.0338(3) 0.0419(15) Uani 1 1 d . . . 
H37A H 0.9219 -0.0978 0.0425 0.050 Uiso 1 1 calc R . . 
C38 C 0.8777(4) -0.0065(3) 0.0516(3) 0.0363(14) Uani 1 1 d . . . 
H38A H 0.9372 0.0102 0.0735 0.044 Uiso 1 1 calc R . . 
C39 C 0.9372(3) 0.1150(2) 0.3285(2) 0.0227(11) Uani 1 1 d . . . 
C40 C 0.9261(4) 0.0926(2) 0.3862(2) 0.0244(11) Uani 1 1 d . . . 
C41 C 0.9947(4) 0.1054(3) 0.4426(2) 0.0258(11) Uani 1 1 d . . . 
H41A H 0.9880 0.0906 0.4819 0.031 Uiso 1 1 calc R . . 
C42 C 1.0735(4) 0.1398(3) 0.4421(2) 0.0260(11) Uani 1 1 d . . . 
C43 C 1.0835(4) 0.1617(2) 0.3857(2) 0.0247(11) Uani 1 1 d . . . 
H43A H 1.1375 0.1853 0.3861 0.030 Uiso 1 1 calc R . . 
C44 C 1.0159(4) 0.1499(3) 0.3278(2) 0.0248(11) Uani 1 1 d . . . 
C45 C 0.8434(4) 0.0501(3) 0.3872(3) 0.0274(12) Uani 1 1 d . . . 
H45A H 0.7895 0.0650 0.3511 0.033 Uiso 1 1 calc R . . 
C46 C 0.8184(4) 0.0612(3) 0.4492(3) 0.0308(12) Uani 1 1 d . . . 
C47 C 0.7997(4) 0.1243(3) 0.4659(3) 0.0388(14) Uani 1 1 d . . . 
H47A H 0.8015 0.1599 0.4384 0.047 Uiso 1 1 calc R . . 
C48 C 0.7783(5) 0.1362(4) 0.5225(3) 0.0492(17) Uani 1 1 d . . . 
H48A H 0.7650 0.1795 0.5331 0.059 Uiso 1 1 calc R . . 
C49 C 0.7767(5) 0.0841(4) 0.5633(3) 0.0530(18) Uani 1 1 d . . . 
H49A H 0.7632 0.0919 0.6022 0.064 Uiso 1 1 calc R . . 
C50 C 0.7945(5) 0.0219(4) 0.5473(3) 0.0481(17) Uani 1 1 d . . . 
H50A H 0.7922 -0.0136 0.5748 0.058 Uiso 1 1 calc R . . 
C51 C 0.8162(4) 0.0095(3) 0.4904(3) 0.0367(14) Uani 1 1 d . . . 
H51A H 0.8293 -0.0339 0.4801 0.044 Uiso 1 1 calc R . . 
C52 C 0.8601(4) -0.0214(3) 0.3754(2) 0.0298(12) Uani 1 1 d . . . 
C53 C 0.9467(4) -0.0484(3) 0.3867(3) 0.0318(13) Uani 1 1 d . . . 
H53A H 0.9995 -0.0215 0.4034 0.038 Uiso 1 1 calc R . . 
C54 C 0.9585(5) -0.1147(3) 0.3740(3) 0.0363(14) Uani 1 1 d . . . 
H54A H 1.0188 -0.1322 0.3821 0.044 Uiso 1 1 calc R . . 
C55 C 0.8826(5) -0.1542(3) 0.3497(3) 0.0427(16) Uani 1 1 d . . . 
H55A H 0.8900 -0.1991 0.3409 0.051 Uiso 1 1 calc R . . 
C56 C 0.7951(5) -0.1275(3) 0.3383(3) 0.0422(15) Uani 1 1 d . . . 
H56A H 0.7424 -0.1543 0.3212 0.051 Uiso 1 1 calc R . . 
C57 C 0.7840(4) -0.0623(3) 0.3515(3) 0.0360(14) Uani 1 1 d . . . 
H57A H 0.7236 -0.0451 0.3442 0.043 Uiso 1 1 calc R . . 
C58 C 1.2163(5) 0.1875(4) 0.5038(3) 0.055(2) Uani 1 1 d . . . 
H58A H 1.2531 0.1942 0.5485 0.082 Uiso 1 1 calc R . . 
H58B H 1.1990 0.2302 0.4832 0.082 Uiso 1 1 calc R . . 
H58C H 1.2527 0.1631 0.4816 0.082 Uiso 1 1 calc R . . 
C59 C 1.0314(4) 0.1749(3) 0.2665(2) 0.0256(11) Uani 1 1 d . . . 
H59A H 0.9703 0.1902 0.2381 0.031 Uiso 1 1 calc R . . 
C60 C 1.0643(4) 0.1203(3) 0.2302(3) 0.0364(14) Uani 1 1 d . . . 
C61 C 1.0939(4) 0.0590(3) 0.2564(4) 0.0469(17) Uani 1 1 d . . . 
H61A H 1.0953 0.0503 0.2992 0.056 Uiso 1 1 calc R . . 
C62 C 1.1211(5) 0.0106(4) 0.2223(4) 0.063(2) Uani 1 1 d . . . 
H62A H 1.1406 -0.0310 0.2411 0.076 Uiso 1 1 calc R . . 
C63 C 1.1195(5) 0.0235(5) 0.1606(5) 0.075(3) Uani 1 1 d . . . 
H63A H 1.1375 -0.0097 0.1366 0.090 Uiso 1 1 calc R . . 
C64 C 1.0909(5) 0.0867(5) 0.1320(4) 0.070(3) Uani 1 1 d . . . 
H64A H 1.0911 0.0958 0.0897 0.084 Uiso 1 1 calc R . . 
C65 C 1.0630(4) 0.1337(4) 0.1678(3) 0.0474(17) Uani 1 1 d . . . 
H65A H 1.0429 0.1755 0.1497 0.057 Uiso 1 1 calc R . . 
C66 C 1.0950(4) 0.2346(3) 0.2807(3) 0.0297(13) Uani 1 1 d . . . 
C67 C 1.0586(4) 0.2951(3) 0.2929(3) 0.0340(13) Uani 1 1 d . . . 
H67A H 0.9945 0.2991 0.2874 0.041 Uiso 1 1 calc R . . 
C68 C 1.1159(5) 0.3487(3) 0.3129(3) 0.0410(15) Uani 1 1 d . . . 
H68A H 1.0911 0.3891 0.3216 0.049 Uiso 1 1 calc R . . 
C69 C 1.2097(5) 0.3435(3) 0.3203(3) 0.0439(16) Uani 1 1 d . . . 
H69A H 1.2489 0.3804 0.3336 0.053 Uiso 1 1 calc R . . 
C70 C 1.2452(4) 0.2852(3) 0.3083(3) 0.0409(15) Uani 1 1 d . . . 
H70A H 1.3094 0.2818 0.3139 0.049 Uiso 1 1 calc R . . 
C71 C 1.1885(4) 0.2300(3) 0.2877(3) 0.0326(13) Uani 1 1 d . . . 
H71A H 1.2139 0.1900 0.2786 0.039 Uiso 1 1 calc R . . 
C72 C 0.5995(5) 0.1784(4) 0.3582(3) 0.0538(18) Uani 1 1 d . . . 
H72A H 0.6279 0.1350 0.3679 0.081 Uiso 1 1 calc R . . 
H72B H 0.5370 0.1738 0.3286 0.081 Uiso 1 1 calc R . . 
H72C H 0.5965 0.1991 0.3977 0.081 Uiso 1 1 calc R . . 
C73 C 0.6558(4) 0.2199(3) 0.3283(3) 0.0422(16) Uani 1 1 d . . . 
C74 C 0.6467(5) 0.2868(4) 0.3283(3) 0.0470(17) Uani 1 1 d . . . 
H74A H 0.6090 0.3038 0.3520 0.056 Uiso 1 1 calc R . . 
C75 C 0.6868(4) 0.3335(3) 0.2972(3) 0.0430(15) Uani 1 1 d . . . 
C76 C 0.6687(5) 0.4060(3) 0.3031(4) 0.056(2) Uani 1 1 d . . . 
H76A H 0.7252 0.4308 0.3068 0.084 Uiso 1 1 calc R . . 
H76B H 0.6493 0.4134 0.3412 0.084 Uiso 1 1 calc R . . 
H76C H 0.6199 0.4205 0.2651 0.084 Uiso 1 1 calc R . . 
  
loop_ 
 _atom_site_aniso_label 
 _atom_site_aniso_U_11 
 _atom_site_aniso_U_22 
 _atom_site_aniso_U_33 
 _atom_site_aniso_U_23 
 _atom_site_aniso_U_13 
 _atom_site_aniso_U_12 
Pd1 0.0235(2) 0.0231(3) 0.0246(3) -0.00295(15) 0.00630(18) 0.00104(15) 
Cl1 0.0392(8) 0.0332(8) 0.0325(8) 0.0055(6) 0.0144(6) -0.0001(6) 
O1 0.032(2) 0.045(2) 0.026(2) 0.0107(17) 0.0027(17) 0.0123(18) 
O2 0.035(2) 0.039(2) 0.0210(19) 0.0019(16) 0.0012(17) -0.0107(18) 
O3 0.0207(17) 0.0246(19) 0.043(2) -0.0045(17) 0.0109(17) 0.0026(15) 
O4 0.043(2) 0.031(2) 0.038(2) -0.0090(17) 0.014(2) 0.0024(18) 
N2 0.023(2) 0.022(2) 0.020(2) -0.0019(17) 0.0051(18) -0.0012(17) 
N5 0.021(2) 0.020(2) 0.022(2) 0.0008(17) 0.0059(18) 0.0022(17) 
C1 0.022(2) 0.029(3) 0.021(3) 0.001(2) 0.010(2) 0.001(2) 
C3 0.027(3) 0.021(3) 0.021(3) 0.000(2) 0.005(2) -0.001(2) 
C4 0.030(3) 0.021(3) 0.024(3) 0.001(2) 0.008(2) 0.000(2) 
C6 0.024(2) 0.018(2) 0.020(2) -0.004(2) 0.002(2) -0.002(2) 
C7 0.027(3) 0.025(3) 0.025(3) -0.006(2) 0.007(2) -0.003(2) 
C8 0.025(3) 0.032(3) 0.032(3) -0.006(2) 0.005(2) 0.003(2) 
C9 0.032(3) 0.027(3) 0.023(3) 0.000(2) -0.002(2) 0.001(2) 
C10 0.032(3) 0.031(3) 0.019(3) 0.000(2) 0.005(2) 0.003(2) 
C11 0.022(2) 0.026(3) 0.023(3) -0.007(2) 0.004(2) -0.004(2) 
C12 0.027(3) 0.031(3) 0.025(3) -0.005(2) 0.010(2) -0.006(2) 
C13 0.026(3) 0.031(3) 0.026(3) -0.002(2) 0.007(2) -0.002(2) 
C14 0.028(3) 0.036(3) 0.047(4) -0.007(3) 0.008(3) 0.001(2) 
C15 0.048(4) 0.039(4) 0.061(5) -0.011(3) 0.021(4) 0.010(3) 
C16 0.042(4) 0.046(4) 0.069(5) 0.009(4) 0.033(4) 0.017(3) 
C17 0.036(4) 0.046(4) 0.112(7) 0.001(4) 0.039(4) 0.002(3) 
C18 0.031(3) 0.035(3) 0.062(4) -0.007(3) 0.020(3) 0.000(3) 
C19 0.020(3) 0.029(3) 0.042(3) -0.002(2) 0.009(2) -0.003(2) 
C20 0.041(4) 0.040(4) 0.043(4) 0.002(3) 0.000(3) -0.002(3) 
C21 0.041(4) 0.038(4) 0.081(6) 0.019(4) 0.006(4) -0.001(3) 
C22 0.023(3) 0.030(3) 0.100(6) -0.003(4) 0.007(4) -0.001(3) 
C23 0.036(3) 0.037(4) 0.068(5) -0.013(3) 0.020(3) -0.003(3) 
C24 0.032(3) 0.031(3) 0.048(4) -0.010(3) 0.013(3) -0.004(2) 
C25 0.050(4) 0.073(5) 0.044(4) 0.007(4) 0.006(3) 0.025(4) 
C26 0.025(3) 0.029(3) 0.024(3) 0.001(2) 0.008(2) 0.003(2) 
C27 0.024(3) 0.030(3) 0.027(3) 0.001(2) 0.010(2) -0.002(2) 
C28 0.035(3) 0.038(3) 0.025(3) 0.000(2) 0.009(2) -0.008(3) 
C29 0.043(3) 0.047(4) 0.029(3) -0.004(3) 0.016(3) -0.002(3) 
C30 0.043(3) 0.033(3) 0.043(4) 0.010(3) 0.023(3) 0.008(3) 
C31 0.051(4) 0.035(3) 0.042(4) 0.002(3) 0.020(3) -0.011(3) 
C32 0.047(4) 0.035(3) 0.034(3) 0.001(3) 0.017(3) -0.002(3) 
C33 0.035(3) 0.030(3) 0.022(3) 0.005(2) 0.012(2) 0.003(2) 
C34 0.036(3) 0.036(3) 0.037(3) -0.007(3) 0.010(3) 0.000(3) 
C35 0.044(4) 0.043(4) 0.059(4) -0.011(3) 0.016(3) -0.002(3) 
C36 0.069(5) 0.028(3) 0.049(4) -0.006(3) 0.022(4) 0.003(3) 
C37 0.053(4) 0.036(3) 0.037(3) 0.007(3) 0.015(3) 0.019(3) 
C38 0.038(3) 0.040(3) 0.030(3) 0.002(3) 0.010(3) 0.007(3) 
C39 0.025(3) 0.020(3) 0.022(3) -0.003(2) 0.006(2) 0.004(2) 
C40 0.026(3) 0.024(3) 0.025(3) 0.000(2) 0.009(2) -0.003(2) 
C41 0.032(3) 0.024(3) 0.022(3) 0.001(2) 0.009(2) -0.005(2) 
C42 0.027(3) 0.023(3) 0.023(3) -0.001(2) 0.000(2) -0.002(2) 
C43 0.026(3) 0.023(3) 0.026(3) 0.000(2) 0.008(2) -0.005(2) 
C44 0.028(3) 0.024(3) 0.024(3) 0.001(2) 0.009(2) 0.004(2) 
C45 0.028(3) 0.030(3) 0.024(3) 0.001(2) 0.009(2) -0.004(2) 
C46 0.032(3) 0.033(3) 0.030(3) -0.002(2) 0.013(2) -0.006(2) 
C47 0.038(3) 0.043(4) 0.039(3) -0.007(3) 0.018(3) -0.008(3) 
C48 0.059(4) 0.051(4) 0.044(4) -0.012(3) 0.024(3) -0.005(3) 
C49 0.061(4) 0.066(5) 0.041(4) -0.013(3) 0.028(3) -0.012(4) 
C50 0.064(4) 0.050(4) 0.036(4) 0.004(3) 0.025(3) -0.014(3) 
C51 0.039(3) 0.046(4) 0.027(3) -0.003(3) 0.012(3) -0.011(3) 
C52 0.041(3) 0.031(3) 0.017(3) 0.003(2) 0.009(2) -0.006(2) 
C53 0.037(3) 0.035(3) 0.021(3) 0.000(2) 0.004(2) -0.002(2) 
C54 0.048(4) 0.036(3) 0.024(3) 0.003(2) 0.011(3) 0.004(3) 
C55 0.066(4) 0.030(3) 0.030(3) -0.001(3) 0.012(3) -0.004(3) 
C56 0.051(4) 0.035(3) 0.037(3) -0.008(3) 0.009(3) -0.017(3) 
C57 0.037(3) 0.036(3) 0.030(3) -0.003(3) 0.002(3) -0.005(3) 
C58 0.047(4) 0.069(5) 0.037(4) 0.003(3) -0.004(3) -0.033(4) 
C59 0.024(3) 0.030(3) 0.023(3) -0.002(2) 0.008(2) -0.002(2) 
C60 0.029(3) 0.049(4) 0.037(3) -0.018(3) 0.017(3) -0.012(3) 
C61 0.035(3) 0.050(4) 0.058(4) -0.016(3) 0.018(3) 0.001(3) 
C62 0.047(4) 0.066(5) 0.081(6) -0.023(4) 0.024(4) 0.006(4) 
C63 0.039(4) 0.103(8) 0.088(7) -0.056(6) 0.026(4) -0.008(4) 
C64 0.049(4) 0.125(8) 0.045(4) -0.039(5) 0.027(4) -0.031(5) 
C65 0.039(3) 0.074(5) 0.033(3) -0.020(3) 0.016(3) -0.020(3) 
C66 0.028(3) 0.042(3) 0.017(3) 0.002(2) 0.006(2) -0.005(2) 
C67 0.035(3) 0.036(3) 0.035(3) -0.002(3) 0.015(3) -0.004(3) 
C68 0.052(4) 0.040(4) 0.034(3) -0.003(3) 0.018(3) -0.007(3) 
C69 0.047(4) 0.046(4) 0.036(3) -0.005(3) 0.009(3) -0.021(3) 
C70 0.034(3) 0.057(4) 0.029(3) 0.004(3) 0.005(3) -0.010(3) 
C71 0.031(3) 0.038(3) 0.029(3) 0.003(2) 0.009(3) -0.009(2) 
C72 0.050(4) 0.071(5) 0.049(4) -0.006(4) 0.028(3) -0.011(4) 
C73 0.034(3) 0.053(4) 0.040(4) -0.009(3) 0.012(3) -0.003(3) 
C74 0.043(4) 0.050(4) 0.054(4) -0.019(3) 0.025(3) 0.000(3) 
C75 0.037(3) 0.044(4) 0.047(4) -0.008(3) 0.012(3) 0.000(3) 
C76 0.050(4) 0.042(4) 0.082(5) -0.017(4) 0.029(4) 0.005(3) 
  
_geom_special_details 
; 
 All esds (except the esd in the dihedral angle between two l.s. planes) 
 are estimated using the full covariance matrix.  The cell esds are taken 
 into account individually in the estimation of esds in distances, angles 
 and torsion angles; correlations between esds in cell parameters are only 
 used when they are defined by crystal symmetry.  An approximate (isotropic) 
 treatment of cell esds is used for estimating esds involving l.s. planes. 
; 
  
loop_ 
 _geom_bond_atom_site_label_1 
 _geom_bond_atom_site_label_2 
 _geom_bond_distance 
 _geom_bond_site_symmetry_2 
 _geom_bond_publ_flag 
Pd1 C1 1.967(5) . ? 
Pd1 O4 2.047(4) . ? 
Pd1 O3 2.077(4) . ? 
Pd1 Cl1 2.2927(15) . ? 
O1 C9 1.376(6) . ? 
O1 C25 1.436(9) . ? 
O2 C42 1.380(6) . ? 
O2 C58 1.420(7) . ? 
O3 C73 1.253(8) . ? 
O4 C75 1.278(8) . ? 
N2 C1 1.350(7) . ? 
N2 C3 1.384(7) . ? 
N2 C6 1.452(6) . ? 
N5 C1 1.362(6) . ? 
N5 C4 1.394(6) . ? 
N5 C39 1.450(6) . ? 
C3 C4 1.330(7) . ? 
C3 H3A 0.9500 . ? 
C4 H4A 0.9500 . ? 
C6 C7 1.400(7) . ? 
C6 C11 1.403(7) . ? 
C7 C8 1.392(8) . ? 
C7 C12 1.520(8) . ? 
C8 C9 1.390(8) . ? 
C8 H8A 0.9500 . ? 
C9 C10 1.386(8) . ? 
C10 C11 1.389(7) . ? 
C10 H10A 0.9500 . ? 
C11 C26 1.526(7) . ? 
C12 C19 1.525(8) . ? 
C12 C13 1.532(8) . ? 
C12 H12A 1.0000 . ? 
C13 C18 1.368(8) . ? 
C13 C14 1.399(8) . ? 
C14 C15 1.399(9) . ? 
C14 H14A 0.9500 . ? 
C15 C16 1.388(10) . ? 
C15 H15A 0.9500 . ? 
C16 C17 1.359(10) . ? 
C16 H16A 0.9500 . ? 
C17 C18 1.393(9) . ? 
C17 H17A 0.9500 . ? 
C18 H18A 0.9500 . ? 
C19 C24 1.383(8) . ? 
C19 C20 1.398(9) . ? 
C20 C21 1.395(9) . ? 
C20 H20A 0.9500 . ? 
C21 C22 1.410(12) . ? 
C21 H21A 0.9500 . ? 
C22 C23 1.362(11) . ? 
C22 H22A 0.9500 . ? 
C23 C24 1.401(9) . ? 
C23 H23A 0.9500 . ? 
C24 H24A 0.9500 . ? 
C25 H25A 0.9800 . ? 
C25 H25B 0.9800 . ? 
C25 H25C 0.9800 . ? 
C26 C27 1.530(7) . ? 
C26 C33 1.536(8) . ? 
C26 H26A 1.0000 . ? 
C27 C28 1.392(8) . ? 
C27 C32 1.394(8) . ? 
C28 C29 1.402(8) . ? 
C28 H28A 0.9500 . ? 
C29 C30 1.364(9) . ? 
C29 H29A 0.9500 . ? 
C30 C31 1.402(9) . ? 
C30 H30A 0.9500 . ? 
C31 C32 1.379(9) . ? 
C31 H31A 0.9500 . ? 
C32 H32A 0.9500 . ? 
C33 C34 1.391(8) . ? 
C33 C38 1.393(8) . ? 
C34 C35 1.387(9) . ? 
C34 H34A 0.9500 . ? 
C35 C36 1.382(10) . ? 
C35 H35A 0.9500 . ? 
C36 C37 1.372(10) . ? 
C36 H36A 0.9500 . ? 
C37 C38 1.364(9) . ? 
C37 H37A 0.9500 . ? 
C38 H38A 0.9500 . ? 
C39 C44 1.398(7) . ? 
C39 C40 1.406(7) . ? 
C40 C41 1.382(7) . ? 
C40 C45 1.534(7) . ? 
C41 C42 1.392(7) . ? 
C41 H41A 0.9500 . ? 
C42 C43 1.370(8) . ? 
C43 C44 1.395(7) . ? 
C43 H43A 0.9500 . ? 
C44 C59 1.525(7) . ? 
C45 C52 1.516(8) . ? 
C45 C46 1.539(8) . ? 
C45 H45A 1.0000 . ? 
C46 C47 1.391(9) . ? 
C46 C51 1.397(8) . ? 
C47 C48 1.401(9) . ? 
C47 H47A 0.9500 . ? 
C48 C49 1.397(10) . ? 
C48 H48A 0.9500 . ? 
C49 C50 1.366(10) . ? 
C49 H49A 0.9500 . ? 
C50 C51 1.411(9) . ? 
C50 H50A 0.9500 . ? 
C51 H51A 0.9500 . ? 
C52 C53 1.381(8) . ? 
C52 C57 1.395(8) . ? 
C53 C54 1.403(8) . ? 
C53 H53A 0.9500 . ? 
C54 C55 1.376(9) . ? 
C54 H54A 0.9500 . ? 
C55 C56 1.389(10) . ? 
C55 H55A 0.9500 . ? 
C56 C57 1.383(9) . ? 
C56 H56A 0.9500 . ? 
C57 H57A 0.9500 . ? 
C58 H58A 0.9800 . ? 
C58 H58B 0.9800 . ? 
C58 H58C 0.9800 . ? 
C59 C66 1.527(8) . ? 
C59 C60 1.539(8) . ? 
C59 H59A 1.0000 . ? 
C60 C61 1.393(10) . ? 
C60 C65 1.393(9) . ? 
C61 C62 1.377(10) . ? 
C61 H61A 0.9500 . ? 
C62 C63 1.374(13) . ? 
C62 H62A 0.9500 . ? 
C63 C64 1.441(14) . ? 
C63 H63A 0.9500 . ? 
C64 C65 1.388(11) . ? 
C64 H64A 0.9500 . ? 
C65 H65A 0.9500 . ? 
C66 C71 1.388(8) . ? 
C66 C67 1.412(9) . ? 
C67 C68 1.383(9) . ? 
C67 H67A 0.9500 . ? 
C68 C69 1.392(9) . ? 
C68 H68A 0.9500 . ? 
C69 C70 1.364(10) . ? 
C69 H69A 0.9500 . ? 
C70 C71 1.407(8) . ? 
C70 H70A 0.9500 . ? 
C71 H71A 0.9500 . ? 
C72 C73 1.493(10) . ? 
C72 H72A 0.9800 . ? 
C72 H72B 0.9800 . ? 
C72 H72C 0.9800 . ? 
C73 C74 1.373(9) . ? 
C74 C75 1.414(10) . ? 
C74 H74A 0.9500 . ? 
C75 C76 1.517(9) . ? 
C76 H76A 0.9800 . ? 
C76 H76B 0.9800 . ? 
C76 H76C 0.9800 . ? 
  
loop_ 
 _geom_angle_atom_site_label_1 
 _geom_angle_atom_site_label_2 
 _geom_angle_atom_site_label_3 
 _geom_angle 
 _geom_angle_site_symmetry_1 
 _geom_angle_site_symmetry_3 
 _geom_angle_publ_flag 
C1 Pd1 O4 178.98(19) . . ? 
C1 Pd1 O3 87.76(18) . . ? 
O4 Pd1 O3 92.69(15) . . ? 
C1 Pd1 Cl1 91.14(15) . . ? 
O4 Pd1 Cl1 88.36(13) . . ? 
O3 Pd1 Cl1 176.53(11) . . ? 
C9 O1 C25 117.3(5) . . ? 
C42 O2 C58 117.5(4) . . ? 
C73 O3 Pd1 121.2(4) . . ? 
C75 O4 Pd1 123.0(4) . . ? 
C1 N2 C3 110.6(4) . . ? 
C1 N2 C6 123.2(4) . . ? 
C3 N2 C6 126.1(4) . . ? 
C1 N5 C4 109.8(4) . . ? 
C1 N5 C39 126.8(4) . . ? 
C4 N5 C39 123.3(4) . . ? 
N2 C1 N5 105.1(4) . . ? 
N2 C1 Pd1 126.9(4) . . ? 
N5 C1 Pd1 127.7(4) . . ? 
C4 C3 N2 107.4(4) . . ? 
C4 C3 H3A 126.3 . . ? 
N2 C3 H3A 126.3 . . ? 
C3 C4 N5 107.1(4) . . ? 
C3 C4 H4A 126.4 . . ? 
N5 C4 H4A 126.4 . . ? 
C7 C6 C11 121.7(5) . . ? 
C7 C6 N2 118.6(5) . . ? 
C11 C6 N2 119.7(4) . . ? 
C8 C7 C6 118.1(5) . . ? 
C8 C7 C12 121.6(5) . . ? 
C6 C7 C12 120.0(5) . . ? 
C9 C8 C7 120.5(5) . . ? 
C9 C8 H8A 119.8 . . ? 
C7 C8 H8A 119.8 . . ? 
O1 C9 C10 116.5(5) . . ? 
O1 C9 C8 123.2(5) . . ? 
C10 C9 C8 120.3(5) . . ? 
C9 C10 C11 120.7(5) . . ? 
C9 C10 H10A 119.6 . . ? 
C11 C10 H10A 119.6 . . ? 
C10 C11 C6 118.0(5) . . ? 
C10 C11 C26 120.4(5) . . ? 
C6 C11 C26 121.1(5) . . ? 
C7 C12 C19 109.8(5) . . ? 
C7 C12 C13 112.8(5) . . ? 
C19 C12 C13 112.4(4) . . ? 
C7 C12 H12A 107.2 . . ? 
C19 C12 H12A 107.2 . . ? 
C13 C12 H12A 107.2 . . ? 
C18 C13 C14 118.5(5) . . ? 
C18 C13 C12 123.1(5) . . ? 
C14 C13 C12 118.4(5) . . ? 
C15 C14 C13 120.9(6) . . ? 
C15 C14 H14A 119.5 . . ? 
C13 C14 H14A 119.5 . . ? 
C16 C15 C14 118.8(6) . . ? 
C16 C15 H15A 120.6 . . ? 
C14 C15 H15A 120.6 . . ? 
C17 C16 C15 120.3(6) . . ? 
C17 C16 H16A 119.9 . . ? 
C15 C16 H16A 119.9 . . ? 
C16 C17 C18 120.7(7) . . ? 
C16 C17 H17A 119.6 . . ? 
C18 C17 H17A 119.6 . . ? 
C13 C18 C17 120.8(6) . . ? 
C13 C18 H18A 119.6 . . ? 
C17 C18 H18A 119.6 . . ? 
C24 C19 C20 118.6(6) . . ? 
C24 C19 C12 122.4(5) . . ? 
C20 C19 C12 119.1(5) . . ? 
C21 C20 C19 121.0(7) . . ? 
C21 C20 H20A 119.5 . . ? 
C19 C20 H20A 119.5 . . ? 
C20 C21 C22 119.3(7) . . ? 
C20 C21 H21A 120.3 . . ? 
C22 C21 H21A 120.3 . . ? 
C23 C22 C21 119.5(6) . . ? 
C23 C22 H22A 120.2 . . ? 
C21 C22 H22A 120.2 . . ? 
C22 C23 C24 121.0(7) . . ? 
C22 C23 H23A 119.5 . . ? 
C24 C23 H23A 119.5 . . ? 
C19 C24 C23 120.5(6) . . ? 
C19 C24 H24A 119.7 . . ? 
C23 C24 H24A 119.7 . . ? 
O1 C25 H25A 109.5 . . ? 
O1 C25 H25B 109.5 . . ? 
H25A C25 H25B 109.5 . . ? 
O1 C25 H25C 109.5 . . ? 
H25A C25 H25C 109.5 . . ? 
H25B C25 H25C 109.5 . . ? 
C11 C26 C27 113.7(4) . . ? 
C11 C26 C33 110.1(4) . . ? 
C27 C26 C33 111.8(4) . . ? 
C11 C26 H26A 107.0 . . ? 
C27 C26 H26A 107.0 . . ? 
C33 C26 H26A 107.0 . . ? 
C28 C27 C32 117.9(5) . . ? 
C28 C27 C26 122.2(5) . . ? 
C32 C27 C26 119.8(5) . . ? 
C27 C28 C29 120.2(5) . . ? 
C27 C28 H28A 119.9 . . ? 
C29 C28 H28A 119.9 . . ? 
C30 C29 C28 121.5(6) . . ? 
C30 C29 H29A 119.2 . . ? 
C28 C29 H29A 119.2 . . ? 
C29 C30 C31 118.5(6) . . ? 
C29 C30 H30A 120.7 . . ? 
C31 C30 H30A 120.7 . . ? 
C32 C31 C30 120.3(6) . . ? 
C32 C31 H31A 119.9 . . ? 
C30 C31 H31A 119.9 . . ? 
C31 C32 C27 121.5(6) . . ? 
C31 C32 H32A 119.3 . . ? 
C27 C32 H32A 119.3 . . ? 
C34 C33 C38 117.4(5) . . ? 
C34 C33 C26 123.2(5) . . ? 
C38 C33 C26 119.4(5) . . ? 
C35 C34 C33 120.7(6) . . ? 
C35 C34 H34A 119.7 . . ? 
C33 C34 H34A 119.7 . . ? 
C36 C35 C34 120.4(6) . . ? 
C36 C35 H35A 119.8 . . ? 
C34 C35 H35A 119.8 . . ? 
C37 C36 C35 119.2(6) . . ? 
C37 C36 H36A 120.4 . . ? 
C35 C36 H36A 120.4 . . ? 
C38 C37 C36 120.5(6) . . ? 
C38 C37 H37A 119.7 . . ? 
C36 C37 H37A 119.7 . . ? 
C37 C38 C33 121.9(6) . . ? 
C37 C38 H38A 119.1 . . ? 
C33 C38 H38A 119.1 . . ? 
C44 C39 C40 120.9(5) . . ? 
C44 C39 N5 118.7(5) . . ? 
C40 C39 N5 120.2(5) . . ? 
C41 C40 C39 118.9(5) . . ? 
C41 C40 C45 119.6(5) . . ? 
C39 C40 C45 121.4(5) . . ? 
C40 C41 C42 120.5(5) . . ? 
C40 C41 H41A 119.8 . . ? 
C42 C41 H41A 119.8 . . ? 
C43 C42 O2 124.5(5) . . ? 
C43 C42 C41 120.3(5) . . ? 
O2 C42 C41 115.2(5) . . ? 
C42 C43 C44 121.1(5) . . ? 
C42 C43 H43A 119.4 . . ? 
C44 C43 H43A 119.4 . . ? 
C43 C44 C39 118.3(5) . . ? 
C43 C44 C59 118.7(5) . . ? 
C39 C44 C59 122.9(5) . . ? 
C52 C45 C40 111.0(5) . . ? 
C52 C45 C46 113.1(4) . . ? 
C40 C45 C46 110.8(4) . . ? 
C52 C45 H45A 107.2 . . ? 
C40 C45 H45A 107.2 . . ? 
C46 C45 H45A 107.2 . . ? 
C47 C46 C51 118.7(5) . . ? 
C47 C46 C45 119.6(5) . . ? 
C51 C46 C45 121.6(5) . . ? 
C46 C47 C48 121.0(6) . . ? 
C46 C47 H47A 119.5 . . ? 
C48 C47 H47A 119.5 . . ? 
C49 C48 C47 119.6(7) . . ? 
C49 C48 H48A 120.2 . . ? 
C47 C48 H48A 120.2 . . ? 
C50 C49 C48 119.8(6) . . ? 
C50 C49 H49A 120.1 . . ? 
C48 C49 H49A 120.1 . . ? 
C49 C50 C51 120.9(6) . . ? 
C49 C50 H50A 119.5 . . ? 
C51 C50 H50A 119.5 . . ? 
C46 C51 C50 119.9(6) . . ? 
C46 C51 H51A 120.1 . . ? 
C50 C51 H51A 120.1 . . ? 
C53 C52 C57 117.9(5) . . ? 
C53 C52 C45 123.6(5) . . ? 
C57 C52 C45 118.4(5) . . ? 
C52 C53 C54 121.4(6) . . ? 
C52 C53 H53A 119.3 . . ? 
C54 C53 H53A 119.3 . . ? 
C55 C54 C53 119.9(6) . . ? 
C55 C54 H54A 120.1 . . ? 
C53 C54 H54A 120.1 . . ? 
C54 C55 C56 119.1(6) . . ? 
C54 C55 H55A 120.4 . . ? 
C56 C55 H55A 120.4 . . ? 
C57 C56 C55 120.7(6) . . ? 
C57 C56 H56A 119.6 . . ? 
C55 C56 H56A 119.6 . . ? 
C56 C57 C52 120.9(6) . . ? 
C56 C57 H57A 119.6 . . ? 
C52 C57 H57A 119.6 . . ? 
O2 C58 H58A 109.5 . . ? 
O2 C58 H58B 109.5 . . ? 
H58A C58 H58B 109.5 . . ? 
O2 C58 H58C 109.5 . . ? 
H58A C58 H58C 109.5 . . ? 
H58B C58 H58C 109.5 . . ? 
C44 C59 C66 110.1(4) . . ? 
C44 C59 C60 112.3(5) . . ? 
C66 C59 C60 113.4(4) . . ? 
C44 C59 H59A 106.9 . . ? 
C66 C59 H59A 106.9 . . ? 
C60 C59 H59A 106.9 . . ? 
C61 C60 C65 119.4(6) . . ? 
C61 C60 C59 123.3(6) . . ? 
C65 C60 C59 117.3(6) . . ? 
C62 C61 C60 122.0(7) . . ? 
C62 C61 H61A 119.0 . . ? 
C60 C61 H61A 119.0 . . ? 
C63 C62 C61 118.9(9) . . ? 
C63 C62 H62A 120.6 . . ? 
C61 C62 H62A 120.6 . . ? 
C62 C63 C64 121.0(7) . . ? 
C62 C63 H63A 119.5 . . ? 
C64 C63 H63A 119.5 . . ? 
C65 C64 C63 118.3(8) . . ? 
C65 C64 H64A 120.9 . . ? 
C63 C64 H64A 120.9 . . ? 
C64 C65 C60 120.5(8) . . ? 
C64 C65 H65A 119.8 . . ? 
C60 C65 H65A 119.8 . . ? 
C71 C66 C67 119.1(5) . . ? 
C71 C66 C59 122.3(5) . . ? 
C67 C66 C59 118.4(5) . . ? 
C68 C67 C66 120.4(6) . . ? 
C68 C67 H67A 119.8 . . ? 
C66 C67 H67A 119.8 . . ? 
C67 C68 C69 120.2(6) . . ? 
C67 C68 H68A 119.9 . . ? 
C69 C68 H68A 119.9 . . ? 
C70 C69 C68 119.7(6) . . ? 
C70 C69 H69A 120.2 . . ? 
C68 C69 H69A 120.2 . . ? 
C69 C70 C71 121.3(6) . . ? 
C69 C70 H70A 119.3 . . ? 
C71 C70 H70A 119.3 . . ? 
C66 C71 C70 119.4(6) . . ? 
C66 C71 H71A 120.3 . . ? 
C70 C71 H71A 120.3 . . ? 
C73 C72 H72A 109.5 . . ? 
C73 C72 H72B 109.5 . . ? 
H72A C72 H72B 109.5 . . ? 
C73 C72 H72C 109.5 . . ? 
H72A C72 H72C 109.5 . . ? 
H72B C72 H72C 109.5 . . ? 
O3 C73 C74 128.0(6) . . ? 
O3 C73 C72 112.5(6) . . ? 
C74 C73 C72 119.4(6) . . ? 
C73 C74 C75 127.6(6) . . ? 
C73 C74 H74A 116.2 . . ? 
C75 C74 H74A 116.2 . . ? 
O4 C75 C74 125.8(6) . . ? 
O4 C75 C76 114.3(6) . . ? 
C74 C75 C76 119.8(6) . . ? 
C75 C76 H76A 109.5 . . ? 
C75 C76 H76B 109.5 . . ? 
H76A C76 H76B 109.5 . . ? 
C75 C76 H76C 109.5 . . ? 
H76A C76 H76C 109.5 . . ? 
H76B C76 H76C 109.5 . . ? 
  
loop_ 
 _geom_torsion_atom_site_label_1 
 _geom_torsion_atom_site_label_2 
 _geom_torsion_atom_site_label_3 
 _geom_torsion_atom_site_label_4 
 _geom_torsion 
 _geom_torsion_site_symmetry_1 
 _geom_torsion_site_symmetry_2 
 _geom_torsion_site_symmetry_3 
 _geom_torsion_site_symmetry_4 
 _geom_torsion_publ_flag 
C1 Pd1 O3 C73 -167.2(5) . . . . ? 
O4 Pd1 O3 C73 11.9(4) . . . . ? 
O3 Pd1 O4 C75 -2.9(5) . . . . ? 
Cl1 Pd1 O4 C75 173.8(4) . . . . ? 
C3 N2 C1 N5 1.9(6) . . . . ? 
C6 N2 C1 N5 -174.5(4) . . . . ? 
C3 N2 C1 Pd1 -172.1(4) . . . . ? 
C6 N2 C1 Pd1 11.5(7) . . . . ? 
C4 N5 C1 N2 -1.3(5) . . . . ? 
C39 N5 C1 N2 174.9(5) . . . . ? 
C4 N5 C1 Pd1 172.6(4) . . . . ? 
C39 N5 C1 Pd1 -11.2(7) . . . . ? 
O3 Pd1 C1 N2 102.3(5) . . . . ? 
Cl1 Pd1 C1 N2 -74.5(4) . . . . ? 
O3 Pd1 C1 N5 -70.4(4) . . . . ? 
Cl1 Pd1 C1 N5 112.9(4) . . . . ? 
C1 N2 C3 C4 -1.8(6) . . . . ? 
C6 N2 C3 C4 174.5(5) . . . . ? 
N2 C3 C4 N5 1.0(6) . . . . ? 
C1 N5 C4 C3 0.2(6) . . . . ? 
C39 N5 C4 C3 -176.1(5) . . . . ? 
C1 N2 C6 C7 -76.7(6) . . . . ? 
C3 N2 C6 C7 107.4(6) . . . . ? 
C1 N2 C6 C11 104.9(6) . . . . ? 
C3 N2 C6 C11 -70.9(7) . . . . ? 
C11 C6 C7 C8 -7.9(8) . . . . ? 
N2 C6 C7 C8 173.8(4) . . . . ? 
C11 C6 C7 C12 166.0(5) . . . . ? 
N2 C6 C7 C12 -12.3(7) . . . . ? 
C6 C7 C8 C9 1.3(8) . . . . ? 
C12 C7 C8 C9 -172.4(5) . . . . ? 
C25 O1 C9 C10 177.9(6) . . . . ? 
C25 O1 C9 C8 0.0(8) . . . . ? 
C7 C8 C9 O1 -178.1(5) . . . . ? 
C7 C8 C9 C10 4.1(8) . . . . ? 
O1 C9 C10 C11 178.9(5) . . . . ? 
C8 C9 C10 C11 -3.2(8) . . . . ? 
C9 C10 C11 C6 -3.1(8) . . . . ? 
C9 C10 C11 C26 169.2(5) . . . . ? 
C7 C6 C11 C10 8.7(8) . . . . ? 
N2 C6 C11 C10 -173.0(4) . . . . ? 
C7 C6 C11 C26 -163.5(5) . . . . ? 
N2 C6 C11 C26 14.8(7) . . . . ? 
C8 C7 C12 C19 103.7(6) . . . . ? 
C6 C7 C12 C19 -69.9(6) . . . . ? 
C8 C7 C12 C13 -22.5(7) . . . . ? 
C6 C7 C12 C13 164.0(5) . . . . ? 
C7 C12 C13 C18 117.9(6) . . . . ? 
C19 C12 C13 C18 -6.9(8) . . . . ? 
C7 C12 C13 C14 -62.6(7) . . . . ? 
C19 C12 C13 C14 172.6(5) . . . . ? 
C18 C13 C14 C15 -1.4(10) . . . . ? 
C12 C13 C14 C15 179.1(6) . . . . ? 
C13 C14 C15 C16 0.4(11) . . . . ? 
C14 C15 C16 C17 0.4(12) . . . . ? 
C15 C16 C17 C18 -0.2(13) . . . . ? 
C14 C13 C18 C17 1.6(10) . . . . ? 
C12 C13 C18 C17 -178.9(6) . . . . ? 
C16 C17 C18 C13 -0.9(12) . . . . ? 
C7 C12 C19 C24 -29.5(7) . . . . ? 
C13 C12 C19 C24 96.9(6) . . . . ? 
C7 C12 C19 C20 151.1(5) . . . . ? 
C13 C12 C19 C20 -82.5(6) . . . . ? 
C24 C19 C20 C21 0.5(9) . . . . ? 
C12 C19 C20 C21 179.8(6) . . . . ? 
C19 C20 C21 C22 -1.6(10) . . . . ? 
C20 C21 C22 C23 1.7(10) . . . . ? 
C21 C22 C23 C24 -0.6(10) . . . . ? 
C20 C19 C24 C23 0.6(9) . . . . ? 
C12 C19 C24 C23 -178.8(5) . . . . ? 
C22 C23 C24 C19 -0.5(9) . . . . ? 
C10 C11 C26 C27 33.3(7) . . . . ? 
C6 C11 C26 C27 -154.6(5) . . . . ? 
C10 C11 C26 C33 -93.0(6) . . . . ? 
C6 C11 C26 C33 79.0(6) . . . . ? 
C11 C26 C27 C28 -106.0(6) . . . . ? 
C33 C26 C27 C28 19.5(7) . . . . ? 
C11 C26 C27 C32 75.4(6) . . . . ? 
C33 C26 C27 C32 -159.2(5) . . . . ? 
C32 C27 C28 C29 -0.1(8) . . . . ? 
C26 C27 C28 C29 -178.8(5) . . . . ? 
C27 C28 C29 C30 1.3(9) . . . . ? 
C28 C29 C30 C31 -1.2(9) . . . . ? 
C29 C30 C31 C32 -0.2(10) . . . . ? 
C30 C31 C32 C27 1.4(10) . . . . ? 
C28 C27 C32 C31 -1.3(9) . . . . ? 
C26 C27 C32 C31 177.5(6) . . . . ? 
C11 C26 C33 C34 24.8(7) . . . . ? 
C27 C26 C33 C34 -102.6(6) . . . . ? 
C11 C26 C33 C38 -157.3(5) . . . . ? 
C27 C26 C33 C38 75.3(6) . . . . ? 
C38 C33 C34 C35 0.9(9) . . . . ? 
C26 C33 C34 C35 178.9(6) . . . . ? 
C33 C34 C35 C36 -0.6(11) . . . . ? 
C34 C35 C36 C37 -0.8(11) . . . . ? 
C35 C36 C37 C38 1.9(10) . . . . ? 
C36 C37 C38 C33 -1.6(10) . . . . ? 
C34 C33 C38 C37 0.2(9) . . . . ? 
C26 C33 C38 C37 -177.8(5) . . . . ? 
C1 N5 C39 C44 -76.0(7) . . . . ? 
C4 N5 C39 C44 99.6(6) . . . . ? 
C1 N5 C39 C40 109.2(6) . . . . ? 
C4 N5 C39 C40 -75.2(6) . . . . ? 
C44 C39 C40 C41 -0.3(8) . . . . ? 
N5 C39 C40 C41 174.4(5) . . . . ? 
C44 C39 C40 C45 -175.7(5) . . . . ? 
N5 C39 C40 C45 -1.0(7) . . . . ? 
C39 C40 C41 C42 -0.1(8) . . . . ? 
C45 C40 C41 C42 175.3(5) . . . . ? 
C58 O2 C42 C43 -1.6(8) . . . . ? 
C58 O2 C42 C41 -178.9(6) . . . . ? 
C40 C41 C42 C43 0.4(8) . . . . ? 
C40 C41 C42 O2 177.8(5) . . . . ? 
O2 C42 C43 C44 -177.4(5) . . . . ? 
C41 C42 C43 C44 -0.4(8) . . . . ? 
C42 C43 C44 C39 -0.1(8) . . . . ? 
C42 C43 C44 C59 -179.4(5) . . . . ? 
C40 C39 C44 C43 0.4(8) . . . . ? 
N5 C39 C44 C43 -174.4(4) . . . . ? 
C40 C39 C44 C59 179.7(5) . . . . ? 
N5 C39 C44 C59 4.9(7) . . . . ? 
C41 C40 C45 C52 -92.7(6) . . . . ? 
C39 C40 C45 C52 82.6(6) . . . . ? 
C41 C40 C45 C46 33.9(7) . . . . ? 
C39 C40 C45 C46 -150.8(5) . . . . ? 
C52 C45 C46 C47 -179.0(5) . . . . ? 
C40 C45 C46 C47 55.6(7) . . . . ? 
C52 C45 C46 C51 2.6(7) . . . . ? 
C40 C45 C46 C51 -122.8(6) . . . . ? 
C51 C46 C47 C48 -0.5(9) . . . . ? 
C45 C46 C47 C48 -178.9(6) . . . . ? 
C46 C47 C48 C49 0.7(10) . . . . ? 
C47 C48 C49 C50 -1.0(11) . . . . ? 
C48 C49 C50 C51 1.1(11) . . . . ? 
C47 C46 C51 C50 0.5(9) . . . . ? 
C45 C46 C51 C50 179.0(6) . . . . ? 
C49 C50 C51 C46 -0.9(10) . . . . ? 
C40 C45 C52 C53 23.2(7) . . . . ? 
C46 C45 C52 C53 -102.1(6) . . . . ? 
C40 C45 C52 C57 -156.6(5) . . . . ? 
C46 C45 C52 C57 78.1(6) . . . . ? 
C57 C52 C53 C54 0.8(8) . . . . ? 
C45 C52 C53 C54 -179.0(5) . . . . ? 
C52 C53 C54 C55 0.0(9) . . . . ? 
C53 C54 C55 C56 -0.1(9) . . . . ? 
C54 C55 C56 C57 -0.5(9) . . . . ? 
C55 C56 C57 C52 1.3(10) . . . . ? 
C53 C52 C57 C56 -1.4(9) . . . . ? 
C45 C52 C57 C56 178.4(5) . . . . ? 
C43 C44 C59 C66 -26.7(7) . . . . ? 
C39 C44 C59 C66 154.0(5) . . . . ? 
C43 C44 C59 C60 100.6(6) . . . . ? 
C39 C44 C59 C60 -78.6(6) . . . . ? 
C44 C59 C60 C61 -11.9(7) . . . . ? 
C66 C59 C60 C61 113.7(6) . . . . ? 
C44 C59 C60 C65 167.4(5) . . . . ? 
C66 C59 C60 C65 -67.0(6) . . . . ? 
C65 C60 C61 C62 -0.7(10) . . . . ? 
C59 C60 C61 C62 178.6(6) . . . . ? 
C60 C61 C62 C63 0.4(11) . . . . ? 
C61 C62 C63 C64 0.6(12) . . . . ? 
C62 C63 C64 C65 -1.3(11) . . . . ? 
C63 C64 C65 C60 1.0(10) . . . . ? 
C61 C60 C65 C64 -0.1(9) . . . . ? 
C59 C60 C65 C64 -179.4(6) . . . . ? 
C44 C59 C66 C71 99.1(6) . . . . ? 
C60 C59 C66 C71 -27.6(7) . . . . ? 
C44 C59 C66 C67 -74.9(6) . . . . ? 
C60 C59 C66 C67 158.4(5) . . . . ? 
C71 C66 C67 C68 -1.3(9) . . . . ? 
C59 C66 C67 C68 172.9(5) . . . . ? 
C66 C67 C68 C69 0.8(9) . . . . ? 
C67 C68 C69 C70 -0.6(9) . . . . ? 
C68 C69 C70 C71 0.8(10) . . . . ? 
C67 C66 C71 C70 1.6(8) . . . . ? 
C59 C66 C71 C70 -172.4(5) . . . . ? 
C69 C70 C71 C66 -1.4(9) . . . . ? 
Pd1 O3 C73 C74 -16.4(9) . . . . ? 
Pd1 O3 C73 C72 165.7(4) . . . . ? 
O3 C73 C74 C75 9.0(12) . . . . ? 
C72 C73 C74 C75 -173.3(7) . . . . ? 
Pd1 O4 C75 C74 -3.1(9) . . . . ? 
Pd1 O4 C75 C76 179.3(4) . . . . ? 
C73 C74 C75 O4 2.7(12) . . . . ? 
C73 C74 C75 C76 -179.8(7) . . . . ? 
  
_diffrn_measured_fraction_theta_max    0.993 
_diffrn_reflns_theta_full              25.00 
_diffrn_measured_fraction_theta_full   0.996 
_refine_diff_density_max    2.492 
_refine_diff_density_min   -1.147 
_refine_diff_density_rms    0.147 
